# Supplementary material
Source: Springer Nature journal article supplement (https://www.springermedizin.de/resource/supplementary/12883_2013_974_MOESM3_ESM.pdf/9456536)
Supplement: MOESM3 [file 9456536]

**Any pain**  
Pain score  $\geq 1$

**Mild pain**  
Pain score 1-3

**Moderate-to-severe pain**  
Pain score  $\geq 4$

Baseline score:

$4.1 \pm 1.9$   
n = 55

$3.7 \pm 2.0$   
n = 132

$2.4 \pm 0.9$   
n = 24

$2.0 \pm 0.8$   
n = 63

$5.5 \pm 1.3$   
n = 31

$5.3 \pm 1.5$   
n = 69

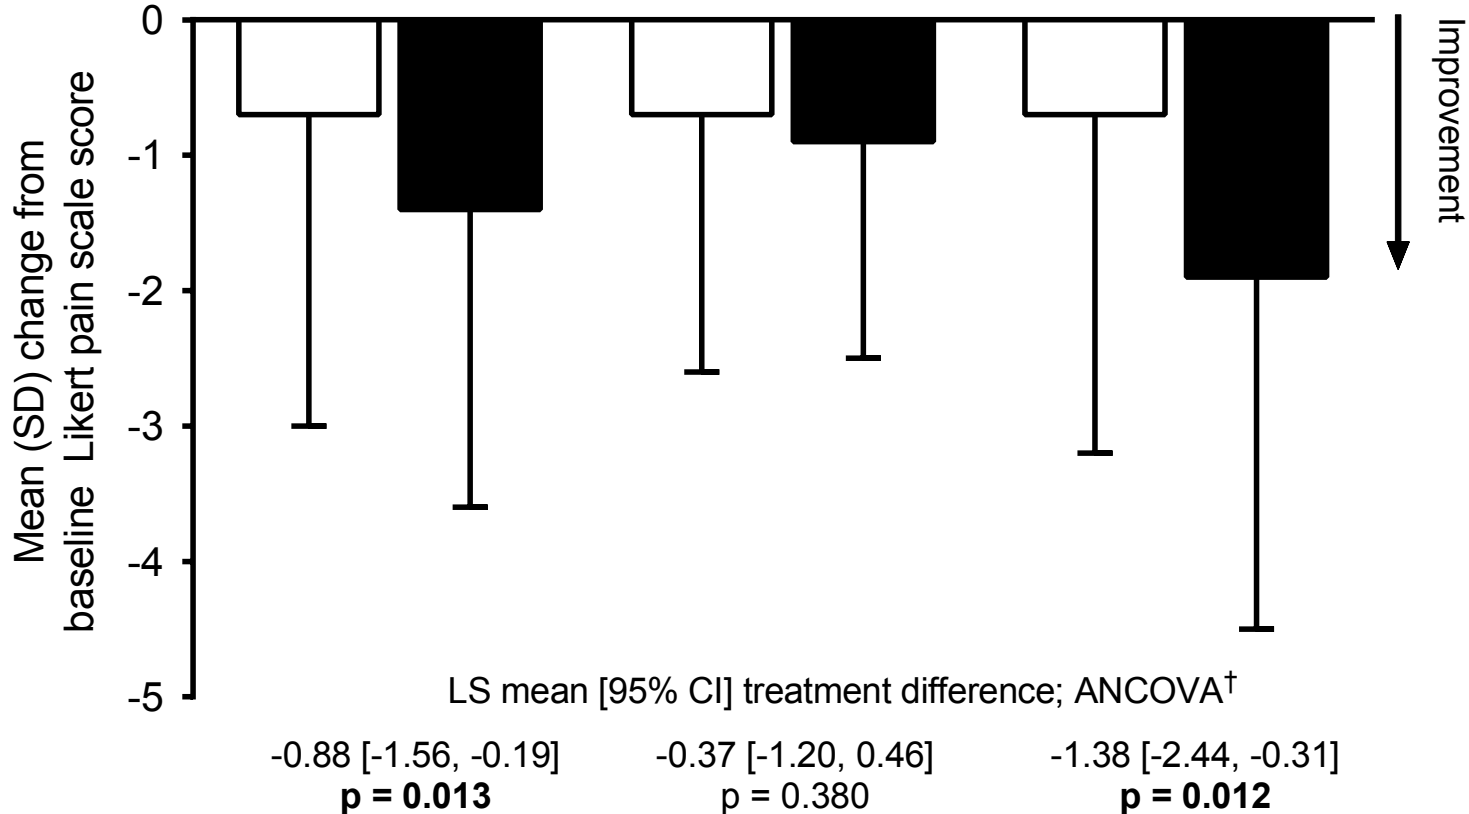

□ Placebo  
■ Rotigotine
